# Supplementary material for: Ethnicity, sex, FADS genetic variation, and hormonal contraceptive use influence delta-5- and delta-6-desaturase indices and plasma docosahexaenoic acid concentration in young Canadian adults: a cross-sectional study
Source: PubMed Central journal article supplement (PMC4410003; doi:10.1186/s12986-015-0010-9), 2015-04-21
Supplement: 12986_2015_10_MOESM1_ESM.pdf [file 12986_2015_10_MOESM1_ESM.pdf]

Additional table 1

HWE values of *FADS1* and *FADS2* and their genotype frequencies.

| Gene name    | SNPs       | Caucasians |              |      |         |              |      | East Asians |              |      |                      |              |      |
|--------------|------------|------------|--------------|------|---------|--------------|------|-------------|--------------|------|----------------------|--------------|------|
|              |            | Males      |              |      | Females |              |      | Males       |              |      | Females              |              |      |
|              |            | HWE        | Major allele | MAF  | HWE     | Major allele | MAF  | HWE         | Major allele | MAF  | HWE                  | Major allele | MAF  |
| <i>FADS1</i> | rs174547   | 0.66       | T            | 0.34 | 0.48    | T            | 0.34 | 0.89        | C            | 0.44 | $8.8 \times 10^{-6}$ | C            | 0.43 |
|              | rs412334   | NP         | G            |      | 0.48    | G            | 0.15 | NP          | G            |      | NP                   | G            |      |
|              | rs695867   | NP         | A            |      | NP      | A            |      | NP          | A            |      | NP                   | A            |      |
|              | rs740006   | NP         | A            |      | NP      | A            |      | NP          | A            |      | NP                   | A            |      |
| <i>FADS2</i> | rs174570   | 0.80       | C            | 0.13 | 0.73    | C            | 0.15 | 0.90        | T            | 0.44 | $5.8 \times 10^{-5}$ | T            | 0.43 |
|              | rs174576   | 0.80       | C            | 0.37 | 0.73    | C            | 0.35 | 0.90        | A            | 0.43 | $5.8 \times 10^{-5}$ | A            | 0.42 |
|              | rs174579   | 0.80       | C            | 0.19 | 0.73    | C            | 0.21 | 0.97        | C            | 0.15 | 0.89                 | C            | 0.14 |
|              | rs174593   | 0.80       | T            | 0.27 | 0.73    | T            | 0.27 | 0.96        | T            | 0.14 | 0.97                 | T            | 0.15 |
|              | rs174602   | 0.80       | A            | 0.25 | 0.91    | A            | 0.23 | 0.82        | A            | 0.41 | 0.07                 | A            | 0.37 |
|              | rs174611   | 0.80       | T            | 0.30 | 0.73    | T            | 0.30 | NP          | T            |      | NP                   | T            |      |
|              | rs174626   | 0.80       | T            | 0.49 | 0.73    | T            | 0.50 | 0.82        | T            | 0.33 | 0.97                 | T            | 0.33 |
|              | rs174627   | 0.80       | C            | 0.17 | 0.70    | C            | 0.15 | NP          | C            |      | NP                   | C            |      |
|              | rs17831757 | 0.80       | T            | 0.11 | 0.73    | T            | 0.13 | NP          | T            |      | NP                   | T            |      |
|              | rs2072114  | 0.80       | A            | 0.17 | 0.73    | A            | 0.14 | 0.90        | A            | 0.43 | 0.07                 | A            | 0.43 |
|              | rs2845573  | NP         | T            |      | 0.51    | T            | 0.09 | 0.82        | T            | 0.42 | 0.07                 | T            | 0.43 |
|              | rs2851682  | 0.80       | A            | 0.11 | 0.70    | A            | 0.10 | 0.82        | A            | 0.43 | 0.07                 | A            | 0.43 |
|              | rs482548   | 0.92       | C            | 0.09 | 0.73    | C            | 0.10 | NP          | C            |      | NP                   | C            |      |
|              | rs498793   | 0.39       | G            | 0.40 | 0.51    | G            | 0.41 | 0.82        | G            | 0.10 | 0.52                 | G            | 0.09 |
|              | rs526126   | 0.80       | C            | 0.20 | 0.33    | C            | 0.19 | 0.78        | C            | 0.17 | 0.97                 | C            | 0.19 |
|              | rs968567   | 0.80       | G            | 0.16 | 0.73    | G            | 0.17 | NP          | G            |      | NP                   | G            |      |

SNPs with HWE p-values less than 0.05 are not in Hardy-Weinberg Equilibrium. Caucasian Males: n = 113; Caucasian females: n = 298; East Asian Males: n = 98; East Asian Females: n = 277. Abbreviations: HWE, Hardy-Weinberg Equilibrium p-values; MA, minor allele; MAF, minor allele frequency; NP, not polymorphic (MAF = 0).
